# Supplementary material for: Dysregulated immune system networks in war veterans with PTSD is an outcome of altered miRNA expression and DNA methylation
Source: PubMed Central journal article supplement (PMC4980621; doi:10.1038/srep31209), 2016-08-11
Supplement: srep31209-s1.pdf [file srep31209-s1.pdf]

# **Dysregulated immune system networks in war veterans with PTSD is an outcome of altered miRNA expression and DNA methylation.**

Marpe Bam<sup>1,3,Ph.D</sup>, Xiaoming Yang<sup>1,2,3,Ph.D</sup>, Elizabeth E. Zumbrun<sup>1,Ph.D</sup>, Yin Zhong<sup>1,BS</sup>, Juhua Zhou<sup>1,4,Ph.D</sup>, Jay P. Ginsberg<sup>2,Ph.D</sup>, Quinne Leyden<sup>2,Psy.D</sup>, Jiajia Zhang<sup>5</sup>, Prakash S. Nagarkatti<sup>1,Ph.D</sup> and Mitzi Nagarkatti<sup>1,2,\*;Ph.D</sup>

<sup>1</sup>Department of Pathology, Microbiology and Immunology, University of South Carolina School of Medicine, Columbia, SC 29209, USA; <sup>2</sup>William Jennings Bryan Dorn Veterans Medical Center, 6439 Garners Ferry Road, Columbia, South Carolina 29209-1639; <sup>4</sup>Current Address: Institute for Tumor Immunology, Ludong University School of Life Sciences, Yantai, Shandong 264025, P.R. China; <sup>5</sup> Department of Epidemiology and Biostatistics, Arnold School of Public Health, University of South Carolina, Columbia, SC 29206, USA

\*Mitzi Nagarkatti, 6439 Garners Ferry Road, Department of Pathology, Microbiology and Immunology, University of South Carolina School of Medicine, Columbia, SC 29209, United States. E-mail:

[mitzi.nagarkatti@uscmed.sc.edu](mailto:mitzi.nagarkatti@uscmed.sc.edu); Phone: 803-216-3404; Fax: 803-216-3413

<sup>3</sup>These authors contributed equally to this work.

## Supplementary Information

**Supplementary Figure S1.** Stacked bar chart showing the top 20 canonical pathways with the percentage of genes present from our dataset. For example, in the top pathways, there are 175 genes in total and ~10 percent of them are present in our dataset.

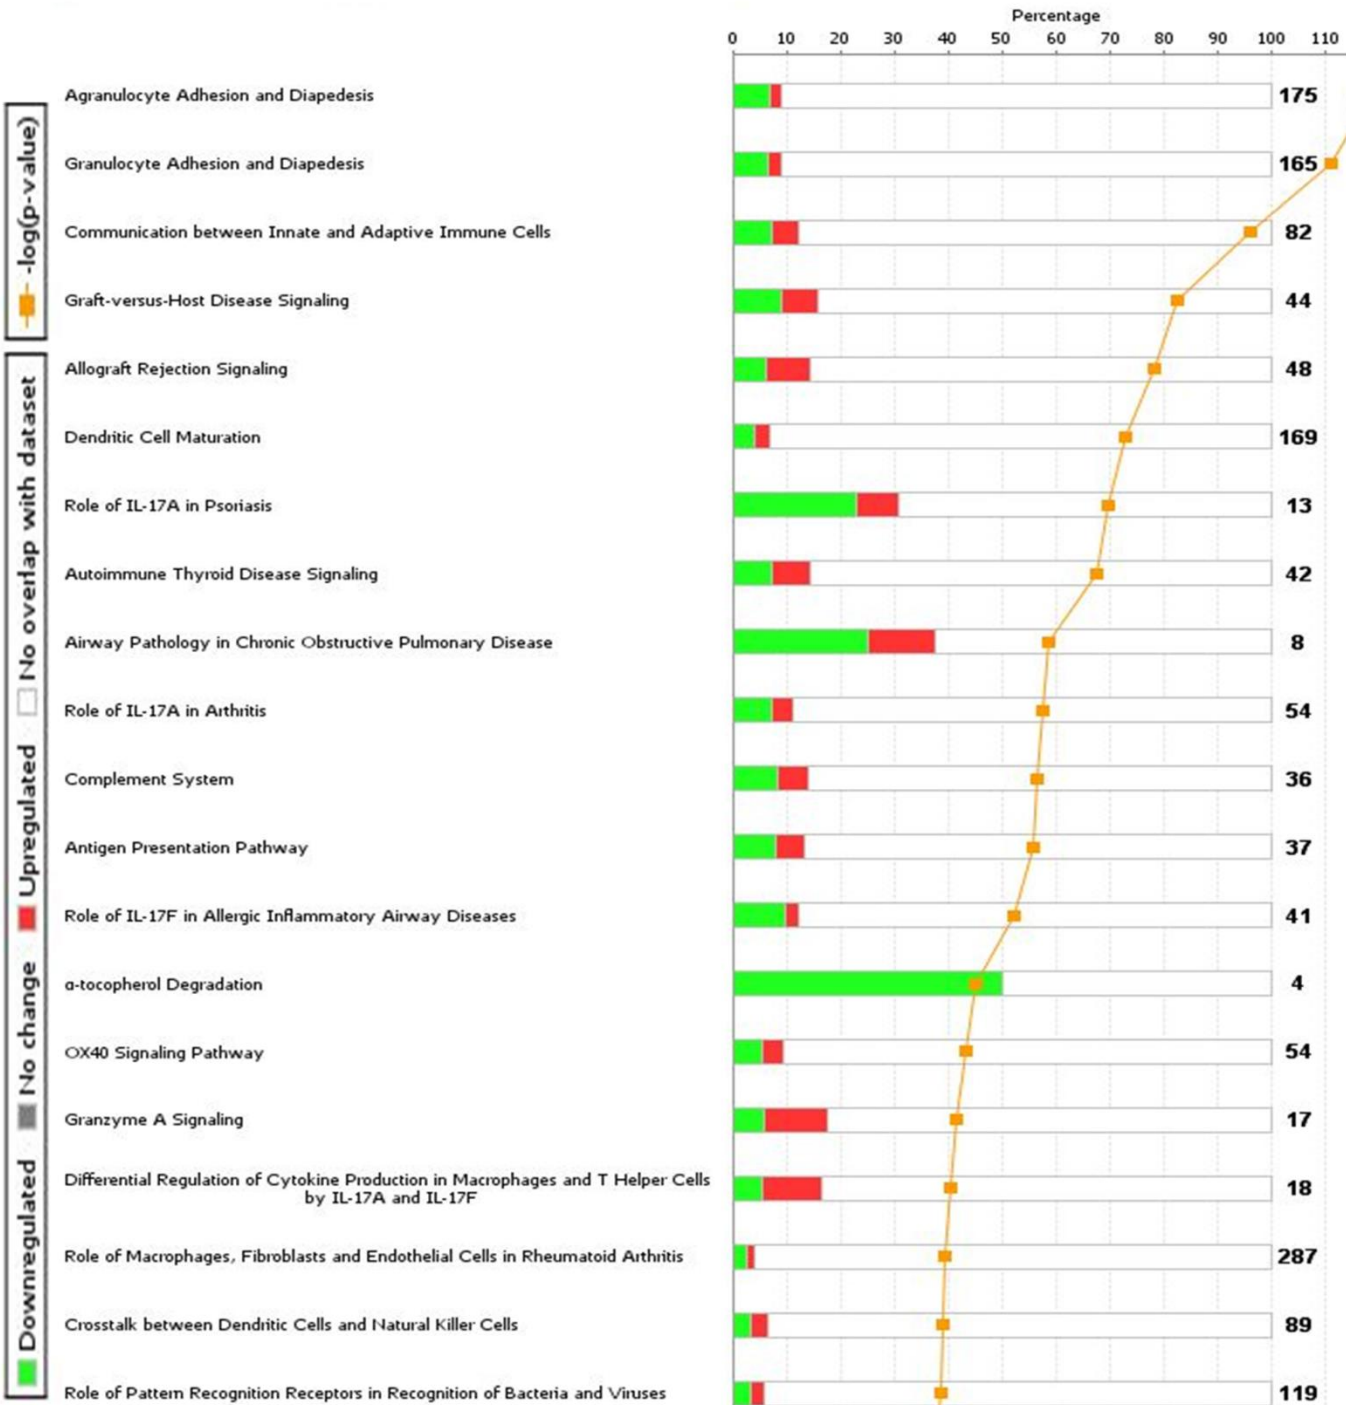

**Supplementary Figure S2.** Micro-RNA and gene interactions displayed as circos plot. RNA-seq was performed on five each control and PTSD samples and the  $\log_2$  fold change of the average of the FPKM values obtained. The circos plot shows the  $\log_2$  fold change of the expression level of the genes and their location on different chromosomes of *Homo sapiens*. The outer circle represents control and the inside for PTSD patients. The colored lines inside the circos plot depict miRNAs where each individual line represents one miRNA. The colored lines connect the chromosomal location of the miRNA and their target genes. Red line indicates up-regulated and green for downregulated miRNAs. The miRNAs were obtained after expression pairing with the RNA-Seq data.

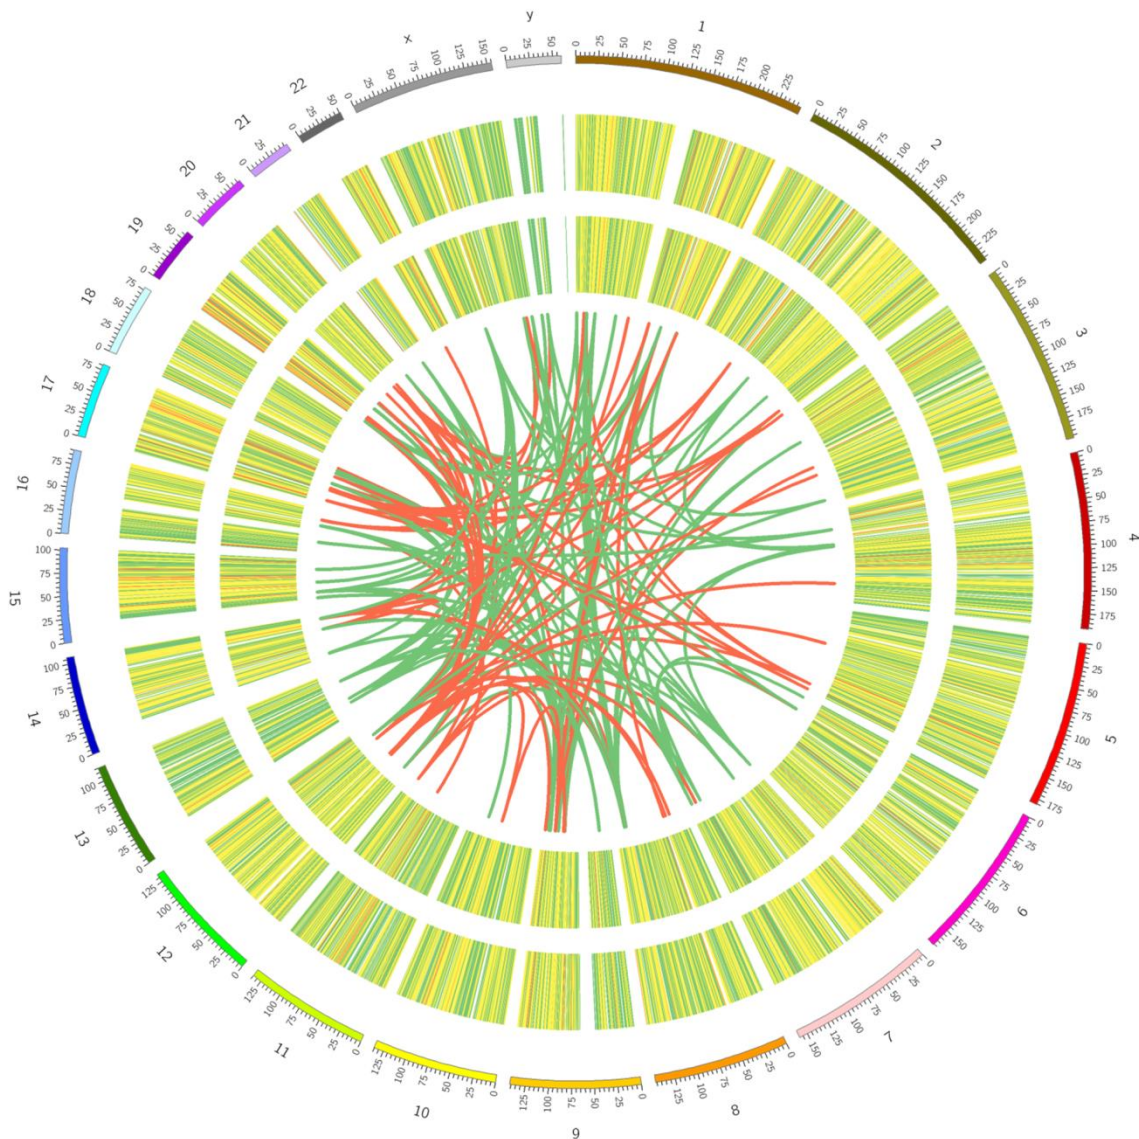

**Supplementary Table S3: List of significantly altered genes in PTSD patients with p value <0.005 and log2 fold change of at least 1 unit.**

| Gene id      | log2(fold change) |
|--------------|-------------------|
| NM_001144963 | ∞ (infinity)      |
| NM_003897    | ∞ (infinity)      |
| NM_006120    | ∞ (infinity)      |
| NM_032787    | ∞ (infinity)      |
| NM_001008226 | 3.94796           |
| NM_022555    | 3.08504           |
| NM_030753    | 2.83619           |
| NM_052863    | 2.54427           |
| NM_002090    | 2.2945            |
| NM_001144931 | 2.18939           |
| NM_004654    | 2.0082            |
| NM_018397    | 2.00633           |
| NM_014840    | 1.96002           |
| NM_173821    | 1.93352           |
| NM_001008    | 1.86473           |
| NM_033256    | 1.83417           |
| NM_001178126 | 1.78344           |
| NM_152353    | 1.77666           |
| NM_001135865 | 1.70078           |
| NM_000598    | 1.68741           |
| NM_000491    | 1.6866            |
| NM_015991    | 1.68385           |
| NM_001023567 | 1.66771           |
| NM_145236    | 1.56786           |
| NM_032108    | 1.5555            |
| NM_002122    | 1.54365           |
| NM_002984    | 1.5327            |
| NM_002089    | 1.52976           |
| NM_006039    | 1.52444           |
| NM_013364    | 1.46958           |
| NM_006988    | 1.46005           |
| NM_004131    | 1.44741           |
| NM_020415    | 1.40461           |
| NM_138360    | 1.39786           |
| NM_016459    | 1.35587           |
| NM_181786    | 1.33046           |
| NM_173574    | 1.28499           |
| NM_001077665 | 1.28039           |
| NM_005041    | 1.27945           |
| NM_020431    | 1.2778            |

|              |          |
|--------------|----------|
| NM_001040025 | 1.27629  |
| NM_033423    | 1.27493  |
| NM_012317    | 1.26908  |
| NM_001145770 | 1.25437  |
| NM_001303012 | 1.24512  |
| NM_030760    | 1.20954  |
| NM_030806    | 1.19672  |
| NM_144646    | 1.19637  |
| NM_004669    | 1.18195  |
| NM_153259    | 1.17901  |
| NM_001975    | 1.1608   |
| NM_007360    | 1.15465  |
| NM_003394    | 1.15246  |
| NM_002985    | 1.14935  |
| NM_013351    | 1.14426  |
| NM_003970    | 1.12269  |
| NM_173799    | 1.1102   |
| NM_005601    | 1.08888  |
| NM_015894    | 1.07848  |
| NM_003151    | 1.06681  |
| NM_006144    | 1.04488  |
| NM_001765    | 1.01915  |
| NM_006235    | 1.01571  |
| NM_058229    | 1.00345  |
| NM_004283    | -1.00505 |
| NM_022746    | -1.00704 |
| NM_030636    | -1.01648 |
| NM_207336    | -1.01943 |
| NM_015549    | -1.04993 |
| NM_018071    | -1.05012 |
| NM_001080497 | -1.05324 |
| NM_014643    | -1.05607 |
| NM_012154    | -1.0637  |
| NM_003174    | -1.07427 |
| NM_178815    | -1.07435 |
| NM_020775    | -1.08718 |
| NM_005319    | -1.08883 |
| NM_001282948 | -1.09151 |
| NM_032582    | -1.1071  |
| NM_173822    | -1.10926 |
| NM_003749    | -1.11358 |
| NM_032536    | -1.12188 |
| NM_016006    | -1.12255 |
| NM_032047    | -1.12609 |
| NM_004567    | -1.12928 |
| NM_006931    | -1.14342 |

|              |          |
|--------------|----------|
| NM_015167    | -1.14587 |
| NM_170604    | -1.14601 |
| NM_004973    | -1.14708 |
| NM_173791    | -1.15374 |
| NM_018053    | -1.1578  |
| NM_001304    | -1.17417 |
| NM_148962    | -1.17745 |
| NM_024576    | -1.18048 |
| NM_001550    | -1.18667 |
| NM_030627    | -1.18754 |
| NM_023037    | -1.18824 |
| NM_001150    | -1.2071  |
| NM_022473    | -1.21366 |
| NM_001127208 | -1.21585 |
| NM_138774    | -1.216   |
| NM_014214    | -1.21814 |
| NM_014681    | -1.22175 |
| NM_005964    | -1.22771 |
| NM_004427    | -1.23851 |
| NM_001077446 | -1.24249 |
| NM_006068    | -1.24397 |
| NM_130445    | -1.24522 |
| NM_001164721 | -1.24733 |
| NM_031476    | -1.25072 |
| NM_004148    | -1.25711 |
| NM_000130    | -1.25994 |
| NM_005621    | -1.26102 |
| NM_014957    | -1.26401 |
| NM_020698    | -1.26424 |
| NM_001440    | -1.26881 |
| NM_001736    | -1.26917 |
| NM_001145841 | -1.26998 |
| NM_015652    | -1.27046 |
| NM_001098634 | -1.27844 |
| NM_014705    | -1.28761 |
| NM_000243    | -1.29162 |
| NM_032833    | -1.29557 |
| NM_030938    | -1.30077 |
| NM_001136023 | -1.31609 |
| NM_018340    | -1.31792 |
| NM_000265    | -1.31878 |
| NM_032898    | -1.32018 |
| NM_032867    | -1.32376 |
| NM_024807    | -1.32474 |
| NM_024617    | -1.33553 |
| NM_080387    | -1.34041 |

|              |          |
|--------------|----------|
| NM_012198    | -1.34266 |
| NM_001785    | -1.34843 |
| NM_005242    | -1.35807 |
| NM_001134194 | -1.35835 |
| NM_001135726 | -1.36603 |
| NM_005502    | -1.36766 |
| NM_152680    | -1.36958 |
| NM_000361    | -1.37013 |
| NM_005338    | -1.3752  |
| NM_080491    | -1.37706 |
| NM_032412    | -1.38116 |
| NM_014397    | -1.38165 |
| NM_014465    | -1.38406 |
| NM_001080424 | -1.38617 |
| NM_020808    | -1.39077 |
| NM_004049    | -1.39153 |
| NM_001013627 | -1.39533 |
| NM_004177    | -1.40273 |
| NM_001174116 | -1.40734 |
| NM_006456    | -1.41191 |
| NM_000573    | -1.412   |
| NM_002863    | -1.4257  |
| NM_194255    | -1.432   |
| NM_000561    | -1.43228 |
| NM_145719    | -1.44543 |
| NM_138788    | -1.44668 |
| NM_001002814 | -1.45221 |
| NM_004536    | -1.45422 |
| NM_001079514 | -1.45666 |
| NM_024569    | -1.46426 |
| NM_001011666 | -1.46846 |
| NM_024298    | -1.47451 |
| NM_001272013 | -1.48877 |
| NM_031890    | -1.48926 |
| NM_021202    | -1.48949 |
| NM_003830    | -1.49086 |
| NM_001817    | -1.50029 |
| NM_001206880 | -1.50141 |
| NM_021083    | -1.5015  |
| NM_001005738 | -1.50903 |
| NM_000963    | -1.52102 |
| NM_198540    | -1.52286 |
| NM_032514    | -1.52327 |
| NM_005384    | -1.52803 |
| NM_000167    | -1.53498 |
| NM_006635    | -1.53499 |

|              |          |
|--------------|----------|
| NM_001122770 | -1.5355  |
| NM_004441    | -1.53607 |
| NM_030759    | -1.53734 |
| NM_012083    | -1.5448  |
| NM_173842    | -1.5511  |
| NM_014737    | -1.55809 |
| NM_002357    | -1.55969 |
| NM_003043    | -1.56557 |
| NM_020982    | -1.5677  |
| NM_032283    | -1.57011 |
| NM_014844    | -1.57672 |
| NM_024081    | -1.57966 |
| NM_003530    | -1.58063 |
| NM_024607    | -1.59013 |
| NM_001069    | -1.60656 |
| NM_138799    | -1.62584 |
| NM_020530    | -1.64337 |
| NM_144669    | -1.64898 |
| NM_001007253 | -1.65293 |
| NM_014991    | -1.65963 |
| NM_000631    | -1.67144 |
| NM_016332    | -1.67216 |
| NM_005451    | -1.67304 |
| NM_018485    | -1.6736  |
| NM_145805    | -1.67932 |
| NM_001145678 | -1.68198 |
| NM_001131055 | -1.68705 |
| NM_002638    | -1.68733 |
| NM_001301104 | -1.68909 |
| NM_007115    | -1.69977 |
| NM_012413    | -1.71433 |
| NM_001286646 | -1.71891 |
| NM_002108    | -1.71994 |
| NM_005746    | -1.72207 |
| NM_012323    | -1.7221  |
| NM_001080975 | -1.73976 |
| NM_033393    | -1.75358 |
| NM_005761    | -1.77812 |
| NM_022481    | -1.77862 |
| NM_014326    | -1.77918 |
| NM_203447    | -1.78357 |
| NM_001207030 | -1.82517 |
| NM_052966    | -1.82872 |
| NM_033027    | -1.83734 |
| NM_006317    | -1.84228 |
| NM_199204    | -1.86234 |



|              |          |
|--------------|----------|
| NM_013450    | -1.86509 |
| NM_198578    | -1.86856 |
| NM_005091    | -1.87153 |
| NM_032571    | -1.8899  |
| NM_000804    | -1.89019 |
| NM_012337    | -1.89692 |
| NM_004566    | -1.89998 |
| NM_004664    | -1.90634 |
| NM_024940    | -1.91588 |
| NM_001134337 | -1.91748 |
| NM_003059    | -1.9269  |
| NM_003526    | -1.95023 |
| NM_025195    | -1.97313 |
| NM_025144    | -1.98928 |
| NM_001815    | -1.99143 |
| NM_001042388 | -2.00888 |
| NM_024565    | -2.0358  |
| NM_000607    | -2.05624 |
| NM_019099    | -2.06305 |
| NM_006705    | -2.06904 |
| NM_006167    | -2.11232 |
| NM_170776    | -2.11943 |
| NM_016612    | -2.12327 |
| NM_000891    | -2.12374 |
| NM_002476    | -2.1261  |
| NM_001205315 | -2.12789 |
| NM_001291703 | -2.13235 |
| NM_001126128 | -2.14825 |
| NM_002125    | -2.16189 |
| NM_001013706 | -2.17365 |
| NM_001143769 | -2.18116 |
| NM_018050    | -2.19678 |
| NM_152891    | -2.1969  |
| NM_005139    | -2.19989 |
| NM_138782    | -2.21169 |
| NM_052839    | -2.21281 |
| NM_001276    | -2.22245 |
| NM_001003938 | -2.22461 |
| NM_004997    | -2.23149 |
| NM_019111    | -2.23853 |
| NM_000634    | -2.24542 |
| NM_178554    | -2.24564 |
| NM_198153    | -2.25377 |
| NM_032564    | -2.2616  |
| NM_002514    | -2.26268 |
| NM_020980    | -2.26772 |

|              |          |
|--------------|----------|
| NM_007365    | -2.29123 |
| NM_001511    | -2.30606 |
| NM_020741    | -2.31643 |
| NM_178500    | -2.32955 |
| NM_002993    | -2.37093 |
| NM_002155    | -2.38861 |
| NM_016633    | -2.38882 |
| NM_015431    | -2.40812 |
| NM_052972    | -2.41457 |
| NM_005306    | -2.41673 |
| NM_024911    | -2.41874 |
| NM_006018    | -2.41909 |
| NM_001143804 | -2.43018 |
| NM_176882    | -2.43756 |
| NM_177551    | -2.45439 |
| NM_020406    | -2.47961 |
| NM_000570    | -2.47966 |
| NM_175710    | -2.47979 |
| NM_003841    | -2.48047 |
| NM_000896    | -2.48078 |
| NM_001282742 | -2.48132 |
| NM_019065    | -2.50699 |
| NM_001199317 | -2.51979 |
| NM_005980    | -2.53461 |
| NM_001557    | -2.54225 |
| NM_001159710 | -2.57339 |
| NM_001291832 | -2.59714 |
| NM_022468    | -2.63583 |
| NM_004668    | -2.69177 |
| NM_003214    | -2.69864 |
| NM_001124    | -2.71289 |
| NM_001293626 | -2.73667 |
| NM_000902    | -2.76579 |
| NM_004665    | -2.77106 |
| NM_004994    | -2.7854  |
| NM_002705    | -2.88847 |
| NM_001243042 | -2.90174 |
| NM_003245    | -2.92565 |
| NM_015297    | -2.93336 |
| NM_001082    | -2.94352 |
| NM_000584    | -2.96178 |
| NM_001080395 | -2.97159 |
| NM_001130981 | -2.99527 |
| NM_001130980 | -3.08661 |
| NM_001172631 | -3.11641 |
| NM_001145248 | -3.1459  |

|              |          |
|--------------|----------|
| NM_000478    | -3.15304 |
| NM_005581    | -3.22104 |
| NM_000715    | -3.26569 |
| NM_000717    | -3.37721 |
| NM_033655    | -3.45161 |
| NM_001010987 | -3.47877 |
| NM_015515    | -3.56923 |
| NM_001039570 | -3.65754 |
| NM_015714    | -3.77249 |
| NM_001190452 | -6.75161 |
| NR_037194    | -3.69867 |
| NR_110907    | -3.33775 |
| NR_026817    | -3.0604  |
| NR_103549    | -2.76247 |
| NR_037142    | -2.59941 |
| NR_126161    | -2.55986 |
| NR_028324    | -2.38937 |
| NR_027072    | -2.25576 |
| NR_103548    | -2.17617 |
| NR_027256    | -2.11981 |
| NR_047572    | -1.97086 |
| NR_037867    | -1.93293 |
| NR_126168    | -1.90112 |
| NR_002189    | -1.8776  |
| NR_109769    | -1.77106 |
| NR_036534    | -1.70274 |
| NR_103791    | -1.54662 |
| NR_103718    | -1.45414 |
| NR_003187    | -1.37966 |
| NR_028502    | -1.32709 |
| NR_120420    | -1.31823 |
| NR_003186    | -1.31434 |
| NR_003505    | -1.2379  |
| NR_039983    | -1.16287 |
| NR_104116    | -1.06893 |
| NR_040085    | 1.06824  |
| NR_027353    | 1.12582  |
| NR_033841    | 1.17126  |
| NR_024433    | 1.29705  |
| NR_027293    | 1.35455  |
| NR_024458    | 1.44115  |
| NR_024011    | 1.5203   |
| NR_036466    | 1.6418   |
| NR_030732    | 1.77503  |
| NR_026958    | 1.89413  |
| NR_028062    | 2.18775  |

|           |         |
|-----------|---------|
| NR_038929 | 2.18956 |
| NR_038402 | 2.24131 |
| NR_047651 | 2.57877 |
| NR_001434 | 3.52181 |

**Supplementary Table S4: List of significantly altered miRNAs in PTSD with p value <0.05 and linear fold change of at least 1.5 units.**

| <b>miRNAs</b>      | <b>linear fold change</b> |
|--------------------|---------------------------|
| hsa-miR-668        | 1.704687008               |
| hsa-miR-219-1-3p   | 1.624110733               |
| hsa-miR-637        | 1.603837943               |
| hsa-miR-518f-star  | 1.578372937               |
| hsa-miR-570        | 1.563301993               |
| hsa-miR-615-5p     | 1.539442786               |
| hsa-miR-519a-star  | 1.515065588               |
| hsa-miR-671-5p     | -1.513276379              |
| hsa-miR-186-star   | -1.533234376              |
| hsa-miR-802        | -1.536867059              |
| hsa-miR-191-star   | -1.538949883              |
| hsa-let-7b-star    | -1.544565846              |
| hsa-miR-938        | -1.549924698              |
| hsa-miR-21-star    | -1.562938624              |
| hsa-miR-140-5p     | -1.584066608              |
| hsa-miR-193b       | -1.584079372              |
| hsa-miR-182        | -1.602199447              |
| hsa-miR-933        | -1.603837943              |
| hsa-miR-301a       | -1.604230837              |
| hsa-miR-92a-1-star | -1.610969718              |
| hsa-miR-188-3p     | -1.612124317              |
| hsa-miR-769-5p     | -1.619629275              |
| hsa-miR-331-3p     | -1.628403243              |
| hsa-miR-29b-1-star | -1.631073308              |
| hsa-miR-1271       | -1.63866009               |
| hsa-miR-128        | -1.648492416              |
| hsa-miR-1231       | -1.655907976              |
| hsa-miR-1224-5p    | -1.658029011              |
| hsa-miR-30e-star   | -1.664775052              |
| hsa-miR-338-5p     | -1.670223594              |
| hsa-miR-139-5p     | -1.693009419              |
| hsa-miR-29b-2-star | -1.699438171              |
| hsa-miR-331-5p     | -1.703534748              |
| hsa-miR-500-star   | -1.706636579              |
| hsa-miR-22         | -1.725784709              |
| hsa-miR-210        | -1.726941395              |
| hsa-miR-532-5p     | -1.741030377              |
| hsa-miR-92b        | -1.751464352              |
| hsa-miR-98         | -1.77113094               |
| hsa-miR-542-5p     | -1.783131839              |
| hsa-miR-30e        | -1.789848063              |

|                   |              |
|-------------------|--------------|
| hsa-miR-152       | -1.791244159 |
| hsa-miR-628-3p    | -1.791556913 |
| hsa-miR-29b       | -1.800038015 |
| hsa-miR-324-3p    | -1.808019672 |
| hsa-miR-24-2-star | -1.809127391 |
| hsa-miR-491-5p    | -1.814149374 |
| hsa-miR-664-star  | -1.816455944 |
| hsa-miR-424-star  | -1.828267124 |
| hsa-miR-487b      | -1.839408293 |
| hsa-miR-502-3p    | -1.842120102 |
| hsa-miR-877       | -1.843238173 |
| hsa-miR-18a       | -1.856575197 |
| hsa-miR-181a-star | -1.866643763 |
| hsa-miR-409-3p    | -1.9283917   |
| hsa-miR-26b       | -1.947325427 |
| hsa-miR-1228      | -1.953007853 |
| hsa-miR-503       | -1.963493062 |
| hsa-miR-940       | -1.967491291 |
| hsa-miR-194       | -1.992670263 |
| hsa-miR-378       | -1.993033555 |
| hsa-miR-324-5p    | -1.99456498  |
| hsa-miR-486-5p    | -2.005740724 |
| hsa-miR-106b      | -2.015959806 |
| hsa-miR-21        | -2.020591768 |
| hsa-miR-29a       | -2.026130537 |
| hsa-miR-1275      | -2.027399815 |
| hsa-miR-20a       | -2.043663261 |
| hsa-miR-28-5p     | -2.049745083 |
| hsa-miR-422a      | -2.058926209 |
| hsa-miR-339-3p    | -2.059662922 |
| hsa-miR-93        | -2.05989118  |
| hsa-miR-150-star  | -2.061832664 |
| hsa-miR-17-star   | -2.066139802 |
| hsa-miR-20b       | -2.072629327 |
| hsa-miR-363       | -2.082007297 |
| hsa-miR-494       | -2.083476929 |
| hsa-miR-99b       | -2.113739554 |
| hsa-miR-941       | -2.116585657 |
| hsa-miR-432       | -2.119353693 |
| hsa-miR-532-3p    | -2.135527535 |
| hsa-miR-15a       | -2.142230916 |
| hsa-miR-132       | -2.152585997 |
| hsa-miR-146a      | -2.153401375 |
| hsa-miR-193a-5p   | -2.170490525 |
| hsa-miR-16        | -2.216802127 |
| hsa-miR-339-5p    | -2.224297675 |

|                     |              |
|---------------------|--------------|
| hsa-miR-425-star    | -2.228973941 |
| hsa-miR-192         | -2.231602194 |
| hsa-miR-106a        | -2.234719489 |
| hsa-miR-1301        | -2.237813218 |
| hsa-miR-421         | -2.240169079 |
| hsa-miR-31          | -2.241966739 |
| hsa-miR-629-star    | -2.26034717  |
| hsa-miR-629         | -2.266320461 |
| hsa-miR-17          | -2.279413244 |
| hsa-miR-146b-5p     | -2.282075069 |
| hsa-miR-1307        | -2.285837546 |
| hsa-miR-24          | -2.290785696 |
| hsa-miR-1246        | -2.305254447 |
| hsa-miR-103         | -2.307375011 |
| hsa-miR-125b        | -2.330878009 |
| hsa-miR-744         | -2.347473709 |
| hsa-miR-27b         | -2.347793261 |
| hsa-miR-423-5p      | -2.353091629 |
| hsa-miR-766         | -2.35338605  |
| hsa-miR-181d        | -2.365123059 |
| hsa-miR-574-5p      | -2.365947195 |
| hsa-miR-99a         | -2.389082419 |
| hsa-miR-222         | -2.407223966 |
| hsa-miR-28-3p       | -2.431094544 |
| hsa-miR-505-star    | -2.434437142 |
| hsa-miR-185         | -2.435432925 |
| hsa-miR-1825        | -2.442791322 |
| hsa-miR-768-3p      | -2.443767655 |
| hsa-miR-423-3p      | -2.44491151  |
| hsa-miR-455-3p      | -2.448347775 |
| hsa-miR-30d         | -2.455219697 |
| hsa-miR-92b-star    | -2.460492937 |
| hsa-let-7i          | -2.462854672 |
| hsa-miR-106b-star   | -2.473040515 |
| hsa-miR-181a-2-star | -2.478217825 |
| hsa-miR-345         | -2.481643276 |
| hsa-miR-181b        | -2.505133305 |
| hsa-let-7g          | -2.509784728 |
| hsa-miR-330-3p      | -2.514597076 |
| hsa-miR-30b         | -2.524190204 |
| hsa-miR-19b         | -2.538700359 |
| hsa-miR-130b        | -2.53992276  |
| hsa-miR-200c        | -2.577618047 |
| hsa-miR-652         | -2.584204515 |
| hsa-miR-93-star     | -2.586868557 |
| hsa-miR-107         | -2.631118544 |

|                   |              |
|-------------------|--------------|
| hsa-miR-574-3p    | -2.641312728 |
| hsa-miR-125a-5p   | -2.644358906 |
| hsa-miR-425       | -2.668503447 |
| hsa-miR-143       | -2.679949843 |
| hsa-miR-625       | -2.714145617 |
| hsa-miR-768-5p    | -2.726943861 |
| hsa-miR-1280      | -2.729666596 |
| hsa-miR-23a       | -2.761756739 |
| hsa-miR-140-3p    | -2.767785231 |
| hsa-miR-663       | -2.774713134 |
| hsa-miR-181c      | -2.807895024 |
| hsa-miR-151-3p    | -2.83430055  |
| hsa-miR-342-3p    | -2.847932593 |
| hsa-miR-320a      | -2.886611594 |
| hsa-miR-342-5p    | -2.887232424 |
| hsa-miR-26a       | -2.888701735 |
| hsa-miR-191       | -2.909399174 |
| hsa-miR-320b      | -2.913674568 |
| hsa-miR-181a      | -2.917067207 |
| hsa-miR-126       | -2.917561364 |
| hsa-miR-199a-5p   | -2.955953091 |
| hsa-miR-150       | -2.965560902 |
| hsa-miR-25        | -3.000046266 |
| hsa-miR-155       | -3.012927327 |
| hsa-miR-199a-3p   | -3.022860966 |
| hsa-miR-1228-star | -3.038080821 |
| hsa-miR-361-5p    | -3.045102941 |
| hsa-miR-30c       | -3.056454043 |
| hsa-miR-92a       | -3.065508171 |
| hsa-miR-320c      | -3.077622432 |
| hsa-miR-584       | -3.08166198  |
| hsa-miR-130a      | -3.138806298 |
| hsa-let-7e        | -3.153144421 |
| hsa-miR-23b       | -3.183528931 |
| hsa-miR-638       | -3.225527797 |
| hsa-let-7f        | -3.251514821 |
| hsa-miR-27a-star  | -3.350893013 |
| hsa-miR-199b-3p   | -3.353999561 |
| hsa-miR-320d      | -3.384660486 |
| hsa-let-7b        | -3.39766532  |
| hsa-miR-197       | -3.452295901 |
| hsa-miR-221       | -3.4672296   |
| hsa-miR-1308      | -3.502713525 |
| hsa-miR-151-5p    | -3.559191665 |
| hsa-miR-223       | -3.583694421 |
| hsa-miR-15b       | -3.594455829 |



|                  |              |
|------------------|--------------|
| hsa-miR-1268     | -3.623250682 |
| hsa-let-7d       | -3.660578086 |
| hsa-miR-23a-star | -3.674395381 |
| hsa-miR-145      | -3.702196255 |
| hsa-miR-1281     | -3.7157141   |
| hsa-let-7c       | -3.909288006 |
| hsa-miR-1826     | -4.006793406 |
| hsa-let-7a       | -4.007043371 |
| hsa-miR-149-star | -4.138447771 |
| hsa-miR-1207-5p  | -4.869370833 |
| hsa-miR-923      | -7.618331152 |

**Supplementary Table S5: List of significantly altered miRNAs in PTSD and their predicted target genes (present in our RNA-Seq dataset) obtained after Expression pairing in Ingenuity Pathway Analysis (IPA).**

| <b>miRNA ID</b>  | <b>Target gene ID (present in the RNA-Seq dataset)</b>                                                                                              |
|------------------|-----------------------------------------------------------------------------------------------------------------------------------------------------|
| hsa-let-7a       | NM_006988, NM_145236, NM_030806, NM_058229, NM_001145770                                                                                            |
| hsa-miR-103      | NM_000491, NM_012317, NM_014840                                                                                                                     |
| hsa-miR-1207-5p  | NM_145236, NM_000491, NM_018397, NM_002089, NM_002090, NM_001145770, NM_144646, NM_007360, NM_138360, NM_001303012, NM_013364, NM_033256, NM_020431 |
| hsa-miR-125a-5p  | NM_006988, NM_027353, NM_000598, NM_005041, NM_015894                                                                                               |
| hsa-miR-1268     | NM_000598                                                                                                                                           |
| hsa-miR-128      | NM_145236, NM_030806, NM_002089, NM_001023567, NM_144646                                                                                            |
| hsa-miR-139-5p   | NM_001023567, NM_001145770                                                                                                                          |
| hsa-miR-140-5p   | NR_027353, NM_004654                                                                                                                                |
| hsa-miR-146b-5p  | NM_002985                                                                                                                                           |
| hsa-miR-16       | NM_006988, NM_030806, NM_000491, NM_012317, NM_014840                                                                                               |
| hsa-miR-181a     | NM_006988, NM_001023567, NM_4654                                                                                                                    |
| hsa-miR-188-3p   | NM_015894, NM_003394                                                                                                                                |
| hsa-miR-663      | NR_027353, NM_012317, NM_173821, NM_052863, NM_015894, NM_013351, NM_020431                                                                         |
| hsa-miR-324-3p   | NM_001040025, NM_006039, NM_013364                                                                                                                  |
| hsa-miR-193a-5p  | NM_001023567, NM_181786                                                                                                                             |
| hsa-miR-194      | NM_030806, NM_002090, NR_024011                                                                                                                     |
| hsa-miR-199b-3p  | NM_030806, NM_001765                                                                                                                                |
| hsa-miR-199a-5p  | NM_030806, NM_004131                                                                                                                                |
| hsa-miR-19b      | NM_058229, NM_001023567, NM_000598, NM_014840, NM_001008, NM_032108, NM_030753                                                                      |
| hsa-miR-219-1-3p | NM_015167, NM_000891, NM_004668                                                                                                                     |
| hsa-miR-24       | NM_018397, NM_001145770, NM_181786, NM_006039, NM_030760                                                                                            |
| hsa-miR-29b      | NM_030806                                                                                                                                           |
|                  | NR_024011                                                                                                                                           |
|                  | NM_013351                                                                                                                                           |
| hsa-miR-30c      | NM_058229                                                                                                                                           |
|                  | NM_014840                                                                                                                                           |
|                  | NM_032108                                                                                                                                           |
| hsa-miR-320d     | NM_153259                                                                                                                                           |
|                  | NM_003151                                                                                                                                           |
|                  | NM_003394                                                                                                                                           |
| hsa-miR-331-3p   | NM_145236                                                                                                                                           |
|                  | NM_058229                                                                                                                                           |
|                  | NM_001178126                                                                                                                                        |
|                  | NM_007360                                                                                                                                           |
|                  | NM_014840                                                                                                                                           |
|                  | NM_030760                                                                                                                                           |
| hsa-miR-339-3p   | NM_015894                                                                                                                                           |
| hsa-miR-339-5p   | NM_002090                                                                                                                                           |
|                  | NM_001145770                                                                                                                                        |
|                  | NM_000598                                                                                                                                           |
|                  | NM_014840                                                                                                                                           |
|                  | NM_013364                                                                                                                                           |

|                |              |
|----------------|--------------|
| hsa-miR-342-3p | NM_145236    |
|                | NM_058229    |
|                | NM_003394    |
| hsa-miR-342-5p | NM_145236    |
|                | NM_030806    |
|                | NM_030760    |
|                | NM_020431    |
| hsa-miR-409-3p | NM_001303012 |
| hsa-miR-423-5p | NM_145236    |
|                | NM_002985    |
|                | NM_001765    |
|                | NR_027353    |
|                | NM_002122    |
|                | NM_006039    |
|                | NM_005601    |
|                | NM_052863    |
| hsa-miR-455-3p | NM_030806    |
|                | NM_005041    |
|                | NM_173799    |
| hsa-miR-486-5p | NM_030806    |
| hsa-miR-491-5p | NM_001145770 |
|                | NM_020431    |
| hsa-miR-502-3p | NM_002122    |
| hsa-miR-532-3p | NM_030806    |
|                | NM_002090    |
|                | NM_001008226 |
|                | NM_001023567 |
|                | NM_030760    |
| hsa-miR-532-3p | NM_002089    |
|                | NM_007360    |
|                | NM_014840    |
| hsa-miR-542-5p | NM_013364    |
| hsa-miR-574-3p | NM_005601    |
| hsa-miR-574-5p | NM_001135865 |
| hsa-miR-615-5p | NM_001134194 |
|                | NM_001082    |
|                | NM_000896    |
|                | NM_001440    |
|                | NM_005242    |
|                | NM_019099    |
|                | NM_033393    |
|                | NM_052972    |
|                | NM_022746    |
|                | NM_024298    |
|                | NM_004668    |
|                | NM_004148    |
|                | NM_032536    |
|                | NM_007365    |
|                | NM_001002814 |
|                | NM_004283    |
|                | NM_014737    |

|                |              |
|----------------|--------------|
|                | NM_021202    |
| hsa-miR-628-3p | NM_006988    |
| hsa-miR-671-5p | NM_006988    |
|                | NM_015991    |
|                | NM_022555    |
|                | NM_032108    |
| hsa-miR-28-5p  | NM_014840    |
|                | NM_004654    |
| hsa-miR-92a    | NM_058229    |
|                | NM_001023567 |
|                | NM_153259    |

**Supplementary Table S6: Genes from the RNA-Seq dataset and their DNA methylation level (Uddin et al., 2010) at the CpG sites near promoter**

| gene_id   | log2 (FC) | Illumina ID for CpG islands | DNA methylation $\beta$ value |          | Expressed in % |          |
|-----------|-----------|-----------------------------|-------------------------------|----------|----------------|----------|
|           |           |                             | Control                       | PTSD     | Control %      | PTSD %   |
| NM_015714 | -3.77249  | cg08185241                  | 0.10664                       | 0.115408 | 10.66399       | 11.54077 |
| NM_033655 | -3.45161  | cg13059782                  | 0.107877                      | 0.110226 | 10.78768       | 11.02263 |
| NM_005581 | -3.22104  | cg21263196                  | 0.040464                      | 0.057431 | 4.046352       | 5.743132 |
| NM_000478 | -3.15304  | cg20645065                  | 0.045869                      | 0.080185 | 4.58686        | 8.018517 |
| NM_001124 | -2.71289  | cg12320306                  | 0.029072                      | 0.045684 | 2.907244       | 4.568398 |
| NM_006018 | -2.41909  | cg05384917                  | 0.878164                      | 0.893789 | 87.81641       | 89.3789  |
| NM_005306 | -2.41673  | cg15479752                  | 0.897454                      | 0.930961 | 89.74544       | 93.09607 |
| NM_002155 | -2.38861  | cg24192663                  | 0.624213                      | 0.65918  | 62.42135       | 65.91805 |
| NM_002993 | -2.37093  | cg25432696                  | 0.082599                      | 0.111331 | 8.259885       | 11.13312 |
| NM_002514 | -2.26268  | cg20379125                  | 0.024985                      | 0.030035 | 2.498505       | 3.003514 |
| NM_052839 | -2.21281  | cg01606998                  | 0.059053                      | 0.064606 | 5.905284       | 6.460622 |
| NM_006167 | -2.11232  | cg21481775                  | 0.07202                       | 0.11019  | 7.202008       | 11.019   |
| NM_006705 | -2.06904  | cg21912567                  | 0.032268                      | 0.054409 | 3.226839       | 5.440854 |
| NM_024565 | -2.0358   | cg17178888                  | 0.036163                      | 0.040318 | 3.616259       | 4.031796 |
| NM_004664 | -1.90634  | cg05647859                  | 0.136636                      | 0.146246 | 13.66365       | 14.62459 |
| NM_012337 | -1.89692  | cg02849695                  | 0.408888                      | 0.437582 | 40.88878       | 43.7582  |
| NM_005091 | -1.87153  | cg02806777                  | 0.201115                      | 0.237597 | 20.11154       | 23.75968 |
| NM_006317 | -1.84228  | cg23496260                  | 0.049395                      | 0.056596 | 4.939471       | 5.659572 |
| NM_033027 | -1.83734  | cg02254461                  | 0.790954                      | 0.820824 | 79.09544       | 82.0824  |
| NM_014326 | -1.77918  | cg23165541                  | 0.726448                      | 0.739955 | 72.64481       | 73.99547 |
| NM_002108 | -1.71994  | cg27246571                  | 0.72369                       | 0.749337 | 72.36898       | 74.93369 |
| NM_003043 | -1.56557  | cg13763232                  | 0.822652                      | 0.847083 | 82.2652        | 84.70826 |
| NM_000167 | -1.53498  | cg15636587                  | 0.19244                       | 0.235275 | 19.24397       | 23.52748 |
| NM_021083 | -1.5015   | cg07489003                  | 0.750652                      | 0.779277 | 75.0652        | 77.92765 |
| NM_004536 | -1.45422  | cg01673583                  | 0.843072                      | 0.868505 | 84.30718       | 86.85053 |
| NM_138788 | -1.44668  | cg05067286                  | 0.243833                      | 0.268424 | 24.3833        | 26.84241 |
| NM_002863 | -1.4257   | cg22960284                  | 0.04503                       | 0.057896 | 4.503004       | 5.789611 |
| NM_006456 | -1.41191  | cg21522303                  | 0.031552                      | 0.049133 | 3.1552         | 4.9133   |
| NM_004049 | -1.39153  | cg24924631                  | 0.63864                       | 0.643363 | 63.864         | 64.3363  |
| NM_080387 | -1.34041  | cg09546307                  | 0.628535                      | 0.667703 | 62.8535        | 66.7703  |
| NM_024617 | -1.33553  | cg05065037                  | 0.046022                      | 0.056873 | 4.6022         | 5.6873   |
| NM_014957 | -1.26401  | cg16425577                  | 0.077807                      | 0.090274 | 7.78069        | 9.027427 |
| NM_031476 | -1.25072  | cg07207789                  | 0.681477                      | 0.710524 | 68.14772       | 71.05239 |
| NM_001150 | -1.2071   | cg05985767                  | 0.861835                      | 0.879598 | 86.18348       | 87.95978 |
| NM_148962 | -1.17745  | cg23759710                  | 0.545449                      | 0.562017 | 54.54492       | 56.2017  |
| NM_003749 | -1.11358  | cg25802424                  | 0.02411                       | 0.034692 | 2.410999       | 3.469228 |
| NM_173822 | -1.10926  | cg14047656                  | 0.026775                      | 0.032799 | 2.677476       | 3.279856 |
| NM_003174 | -1.07427  | cg03259469                  | 0.048204                      | 0.06542  | 4.820393       | 6.542007 |
| NM_022746 | -1.00704  | cg02265318                  | 0.050013                      | 0.063341 | 5.00131        | 6.334149 |

|                |                |                                    |                                                 |             |                       |               |
|----------------|----------------|------------------------------------|-------------------------------------------------|-------------|-----------------------|---------------|
| NM_004283      | -1.00505       | cg20780953                         | 0.062019                                        | 0.09422     | 6.2019                | 9.422         |
|                |                |                                    |                                                 |             |                       |               |
|                |                |                                    | <b>DNA methylation <math>\beta</math> value</b> |             | <b>Expressed in %</b> |               |
| <b>gene_id</b> | <b>log2 FC</b> | <b>Illumina ID for CpG islands</b> | <b>Control</b>                                  | <b>PTSD</b> | <b>Control %</b>      | <b>PTSD %</b> |
| NM_058229      | 1.00345        | cg25406735                         | 0.023595                                        | 0.011652    | 2.3595                | 1.1652        |
| NM_003151      | 1.06681        | cg20195812                         | 0.067109                                        | 0.055412    | 6.710918              | 5.54115       |
| NM_003394      | 1.15246        | cg05164634                         | 0.036298                                        | 0.028078    | 3.629845              | 2.807764      |
| NM_001975      | 1.1608         | cg13334990                         | 0.25642                                         | 0.230102    | 25.64202              | 23.01024      |
| NM_004669      | 1.18195        | cg15387123                         | 0.079                                           | 0.070573    | 7.899981              | 7.0573        |
| NM_030760      | 1.20954        | cg24807354                         | 0.063902                                        | 0.05765     | 6.390206              | 5.764969      |
| NM_006988      | 1.46005        | cg00472814                         | 0.036104                                        | 0.027095    | 3.610413              | 2.709523      |
| NM_000598      | 1.68741        | cg22083798                         | 0.087192                                        | 0.078724    | 8.719159              | 7.872437      |
| NM_014840      | 1.96002        | cg23555120                         | 0.155161                                        | 0.120884    | 15.51612              | 12.08836      |
| NM_018397      | 2.00633        | cg12991365                         | 0.224253                                        | 0.185049    | 22.42525              | 18.50489      |
| NM_052863      | 2.54427        | cg14472601                         | 0.561465                                        | 0.521927    | 56.1465               | 52.19265      |
| NM_030753      | 2.83619        | cg00126034                         | 0.032501                                        | 0.021376    | 3.250058              | 2.137591      |
